# Supplementary material for: Determinants of Child Nutritional Status among Scheduled Tribes in West Bengal
Source: Preprints.org preprint supplement (doi:10.20944/preprints202306.0653.v1), 2023-06-09
Supplement: Supplementary file 1 [file supplementary]

**Funding:**

There was no funding received to assistance with the creation of this manuscript.

**Conflict of Interest:**

The corresponding author declares that there is no conflict of interest.

**Credit Author Statement:**

Manabindra Barman1: Conceptualization, Data curation, Formal analysis, Conceptualization, Methodology, Software, Writing-original draft.

Dr. Indrajit Roy Chowdhury2: Visualization, Validation, Supervision, Writing-reviewing.
